# Supplementary material
Source: MDPI journal article supplement (https://www.mdpi.com/2076-3263/11/8/330)
Supplement: s1 [file s1]

## Article

# Storm Driven Migration of the Napatree Barrier, Rhode Island, USA

Bryan A. Oakley

## Supplementary Materials

**Table S1.** Water levels exceeding the 0.7 m MHHW threshold at the Newport, RI and New London tide gauges.

| Date               | Newport, RI Water Level (m MHHW) | New London, CT Water Level (m MHHW) | Storm Name           |
|--------------------|----------------------------------|-------------------------------------|----------------------|
| 9/21/1938          | 2.88                             | 2.3                                 | Hurricane of 1938    |
| 9/14 to 9/15/1944  | 1.21                             | 1.2                                 | Hurricane of 1944    |
| 11/30/1944         | 0.78                             | 0.74                                | Extra-tropical storm |
| 3/3/1947           | 0.72                             | 0.44                                | Extra-tropical storm |
| 11/25/1950         | 0.50                             | 1.38                                | Extra-tropical storm |
| 11/7/1953          | 0.78                             | 1.1                                 | -                    |
| 8/31/1954          | 2.06                             | 1.78                                | Hurricane Carol      |
| 9/12/1960          | 0.81                             | 1.2                                 | Hurricane Donna      |
| 3/7/1962           | 0.72                             | 0.71                                | Ash Wednesday        |
| 11/30/1963         | 0.96                             | 0.74                                | -                    |
| 2/19/1972          | 0.71                             | 0.86                                | -                    |
| 11/20/1972         | 0.83                             | 0.62                                | -                    |
| 12/2/1974          | 0.98                             | 0.87                                | -                    |
| 2/2/1976           | 0.75                             | 0.25                                | -                    |
| 1/9/1978           | 1.02                             | -                                   | -                    |
| 2/6/1978           | 0.77                             | -                                   | Blizzard of 1978     |
| 9.28/1985          | 0.80                             | 0.9                                 | Hurricane Gloria     |
| 12/3/1986          | 0.74                             | 0.55                                | -                    |
| 1/2/1987           | 0.70                             | 0.66                                | -                    |
| 1/23/1987          | 0.83                             | 0.97                                | -                    |
| 12/4/1990          | 0.71                             | 0.68                                | -                    |
| 8/19/1991          | 1.14                             | 0.83                                | Hurricane Bob        |
| 10/31/1991         | 0.98                             | 1.04                                | Halloween Nor'Easter |
| 12/11 - 12/13/1992 | 0.72                             | 0.95                                | -                    |
| 1/19/1996          | 0.71                             | 0.42                                | -                    |
| 1/10/1997          | 0.93                             | 0.67                                | -                    |
| 12/12/2000         | 0.71                             | 0.48                                | -                    |
| 11/6/2002          | 0.70                             | 0.74                                | -                    |
| 10/28/2006         | 0.73                             | 0.84                                | -                    |
| 4/16/2007          | 0.86                             | 0.88                                | Patriots Day         |
| 12/12/2008         | 0.80                             | 0.73                                | -                    |
| 12/3/2009          | 0.74                             | 0.6                                 | -                    |
| 8/28/2011          | 0.80                             | 1.01                                | Tropical Storm Irene |
| 6/4/2012           | 0.71                             | 0.62                                | -                    |
| 10/29/2012         | 1.32                             | 1.47                                | Hurricane Sandy      |
| 12/27/2012         | 0.75                             | 0.87                                | -                    |

2/9/2016

0.77

0.67

-

**Table S2.** Average distance from baseline and standard deviation of shoreline position used in this analysis. See table 3 for the source of the shorelines. .

| Shoreline    | Average Distance from Baseline (m) | Standard Deviation of Shoreline Position (m) |
|--------------|------------------------------------|----------------------------------------------|
| 1883 T-Sheet | 127.3                              | 10.8                                         |
| 5/25/1939    | 117.9                              | 7.7                                          |
| 1948 T-Sheet | 93.8                               | 11.5                                         |
| 11/22/1951   | 80.4                               | 8.3                                          |
| 10/5/1963    | 58.5                               | 7.8                                          |
| 4/14/1975    | 48.4                               | 8.4                                          |
| 3/22/1985    | 51.2                               | 4.8                                          |
| 3/18/1992    | 56.0                               | 5.0                                          |
| 4/8/2004     | 51.4                               | 3.2                                          |
| 6/1/2012     | 57.4                               | 6.9                                          |
| 4/15/2014    | 54.5                               | 6.5                                          |

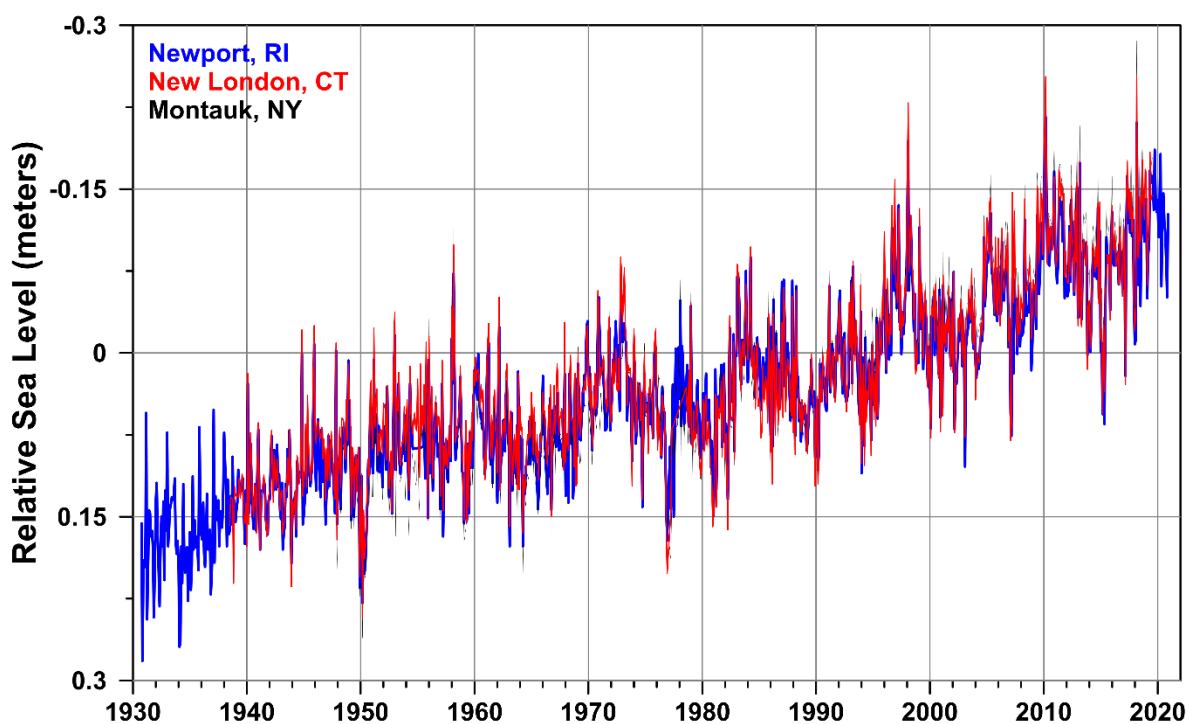

**Figure S1.** Monthly sea level elevations at the Newport, RI [1], New London, CT [2] and Montauk, NY tide gauges [3].

Supplemental Figures S2–S20, Oakley, 2021. Vertical Aerial Photographs used in the qualitative and quantitative analysis. See table 2 for a listing of the photographs used to delineate shoreline positions.

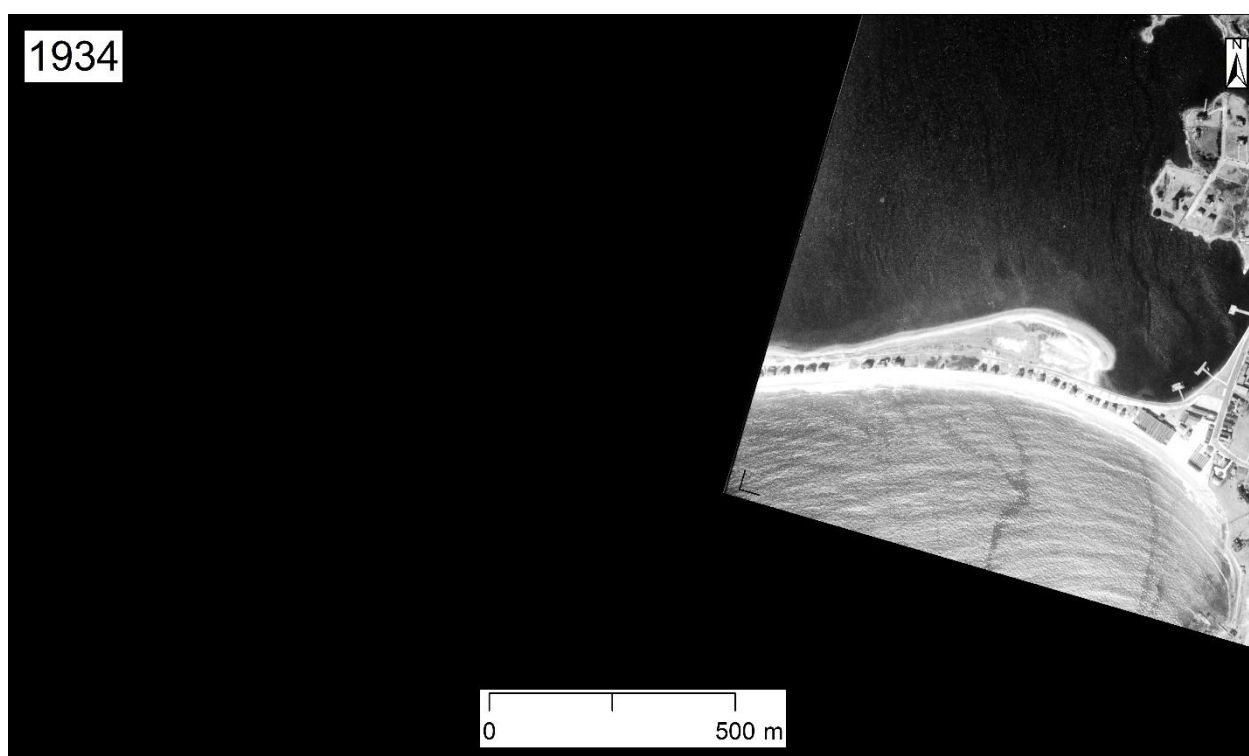

**Figure S2.** 1934 Partial vertical aerial photograph of the Napatree Barrier [4].

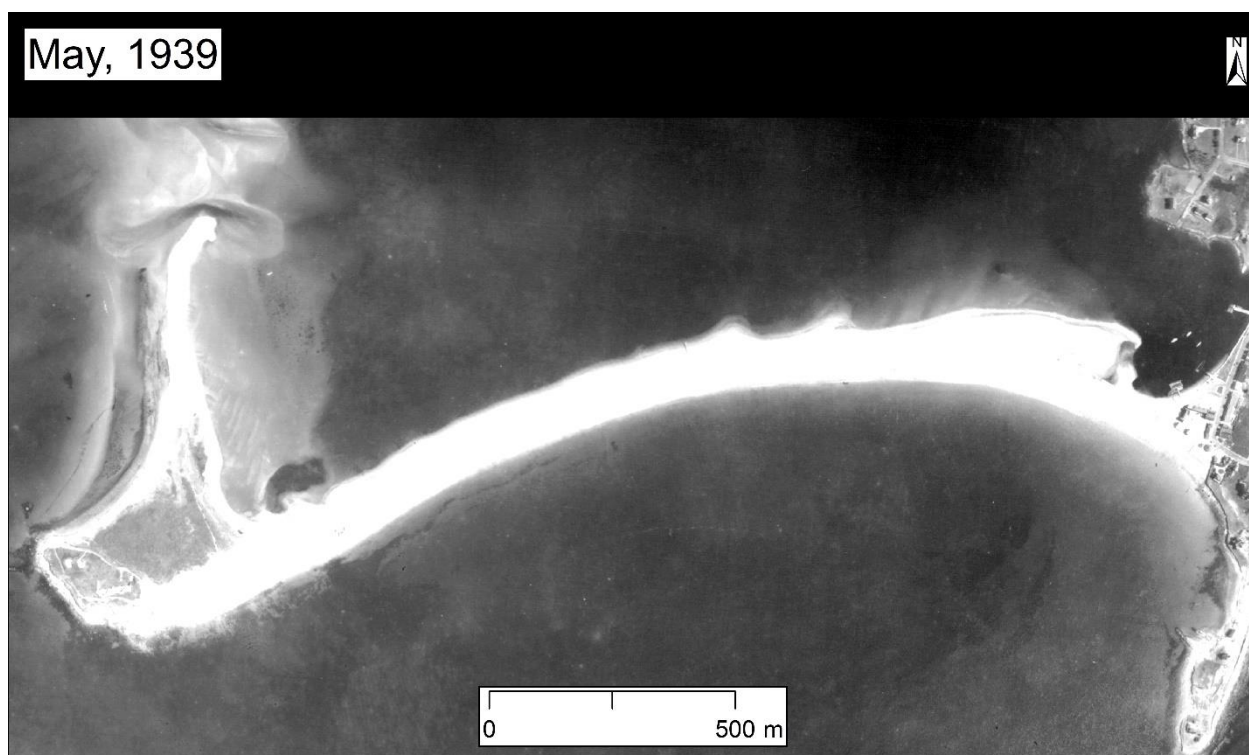

**Figure S3.** 1939 Vertical aerial photograph of the Napatree Barrier [5].

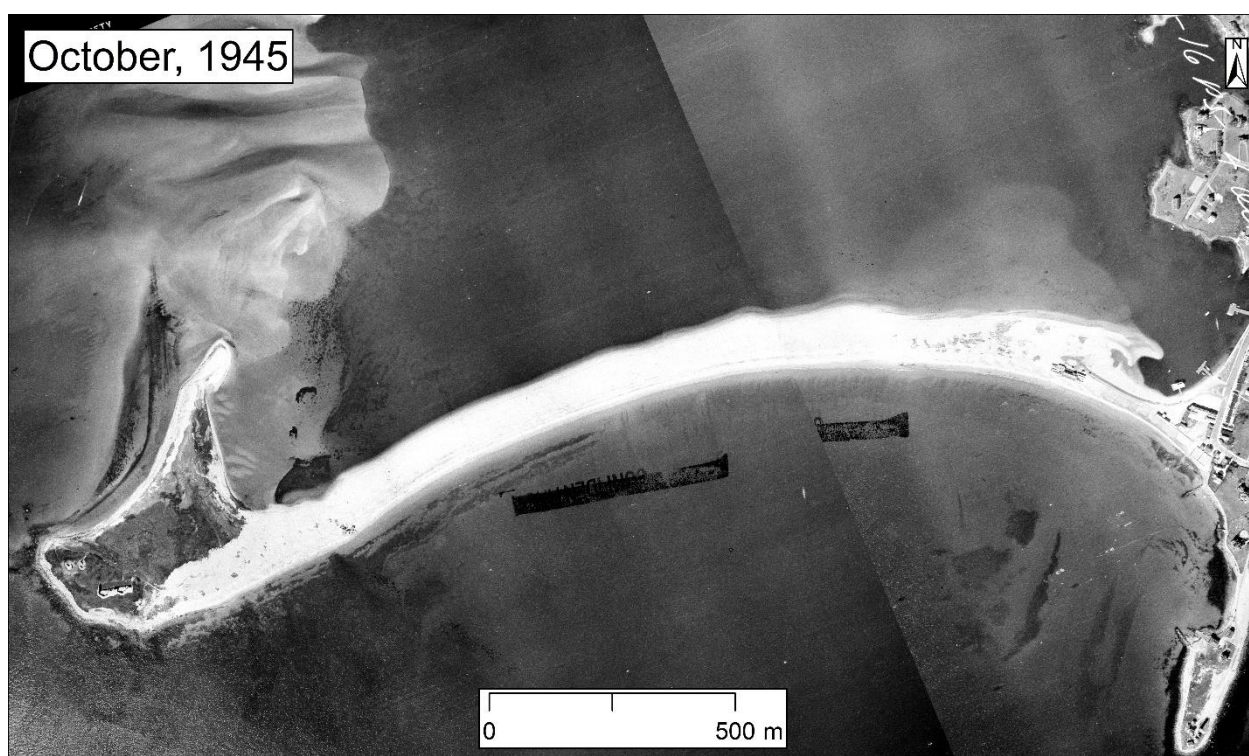

**Figure S4.** 1945 Vertical aerial photograph of the Napatree Barrier.

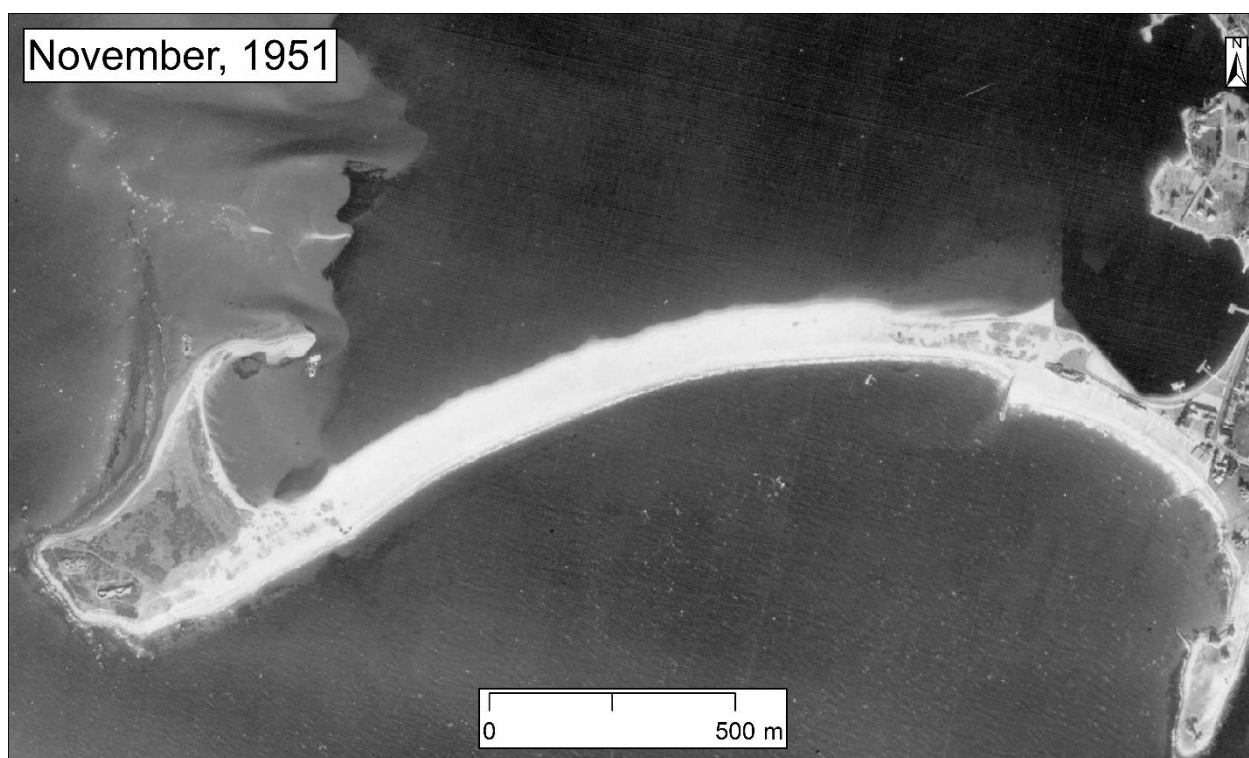

**Figure S5.** 1951 Vertical aerial photograph of the Napatree Barrier [6].



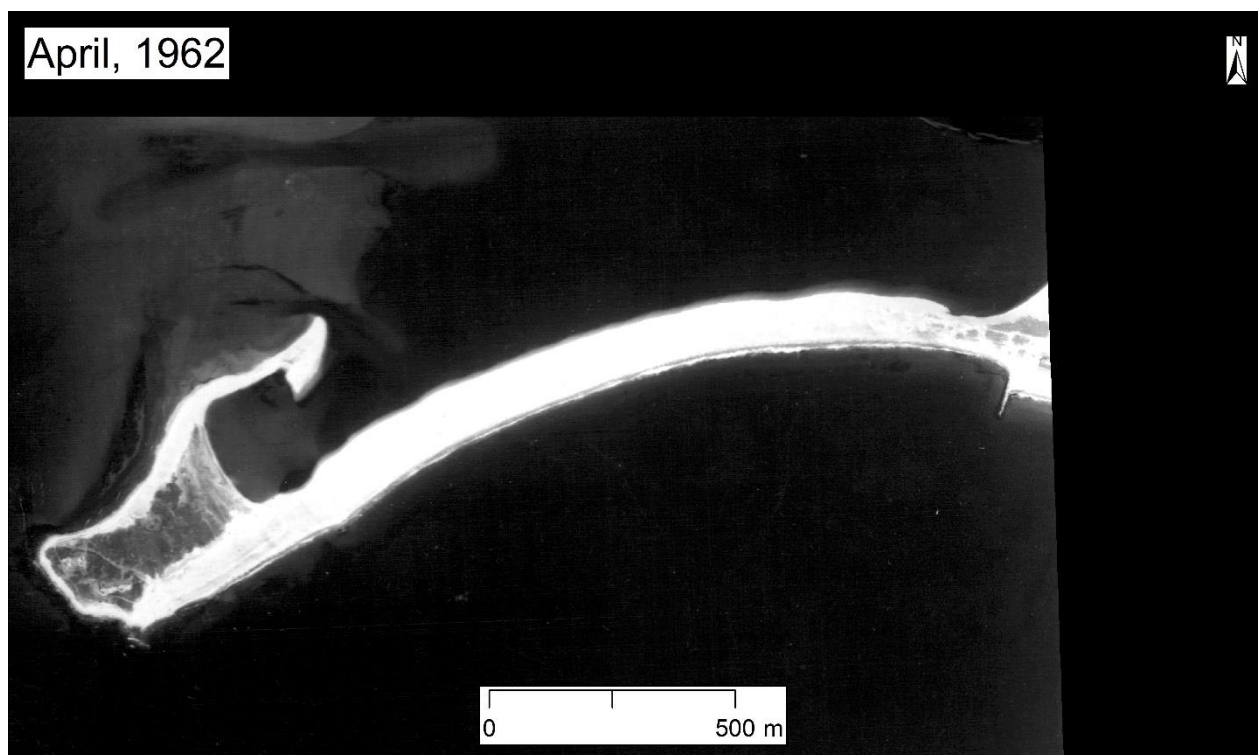

**Figure S6.** April 1962 Vertical aerial photograph of the Napatree Barrier [7].

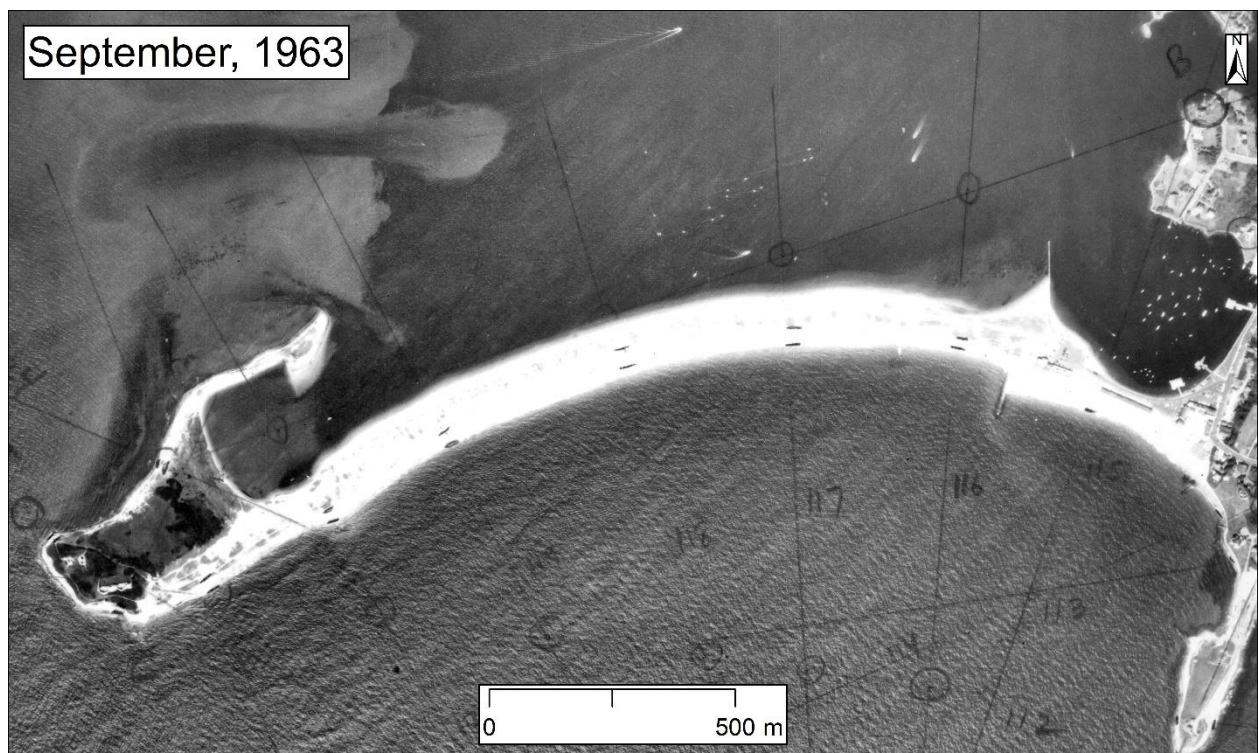

**Figure S7.** September 1963 Vertical aerial photograph of the Napatree Barrier. Original 9×9 Photograph scanned by Boothroyd and Hehre, [8].

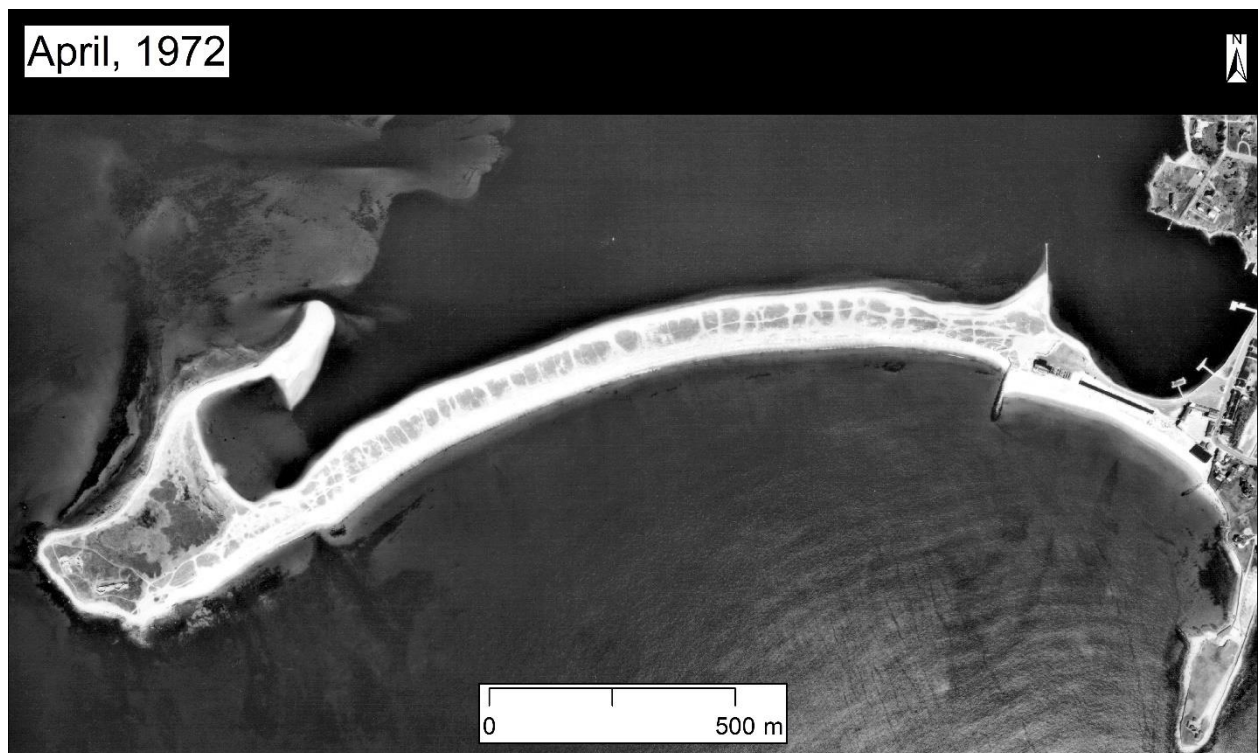

**Figure S8.** April 1972 Vertical aerial photograph of the Napatree Barrier [9].

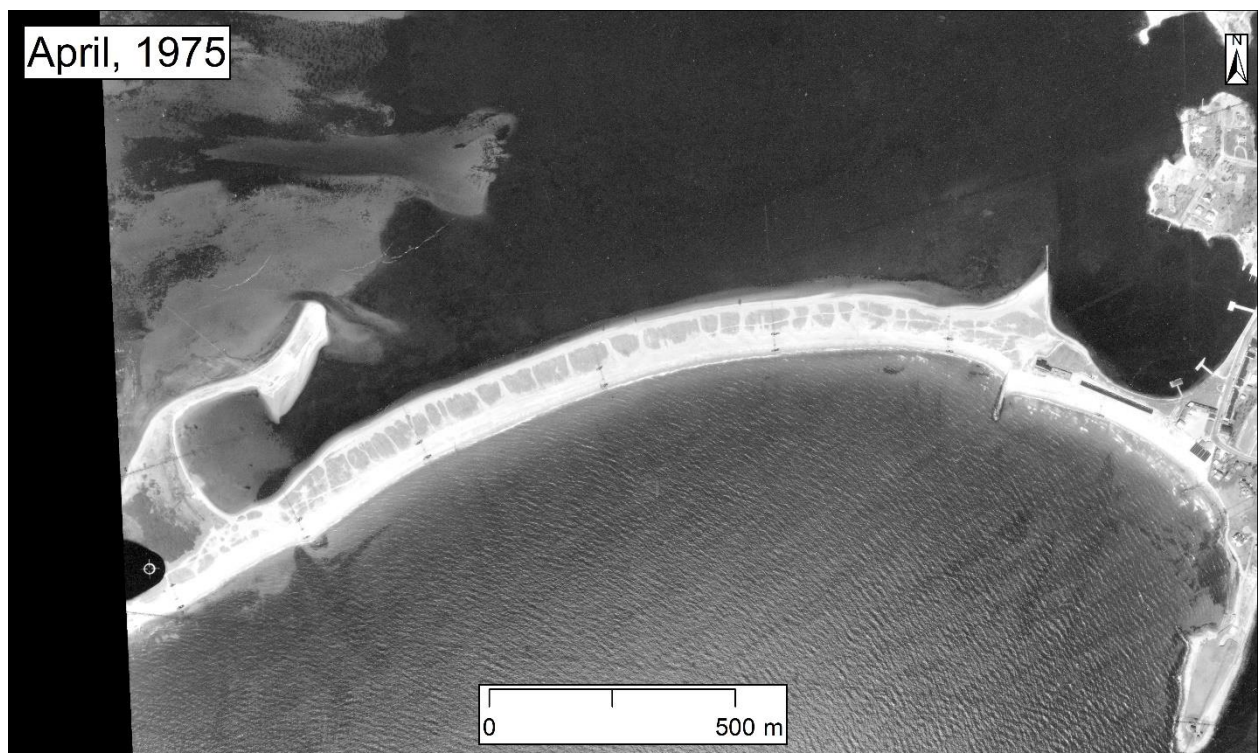

**Figure S9.** April 1975 Vertical aerial photograph of the Napatree Barrier. Original 9x9 Photograph scanned by Boothroyd and Hehre, [8].



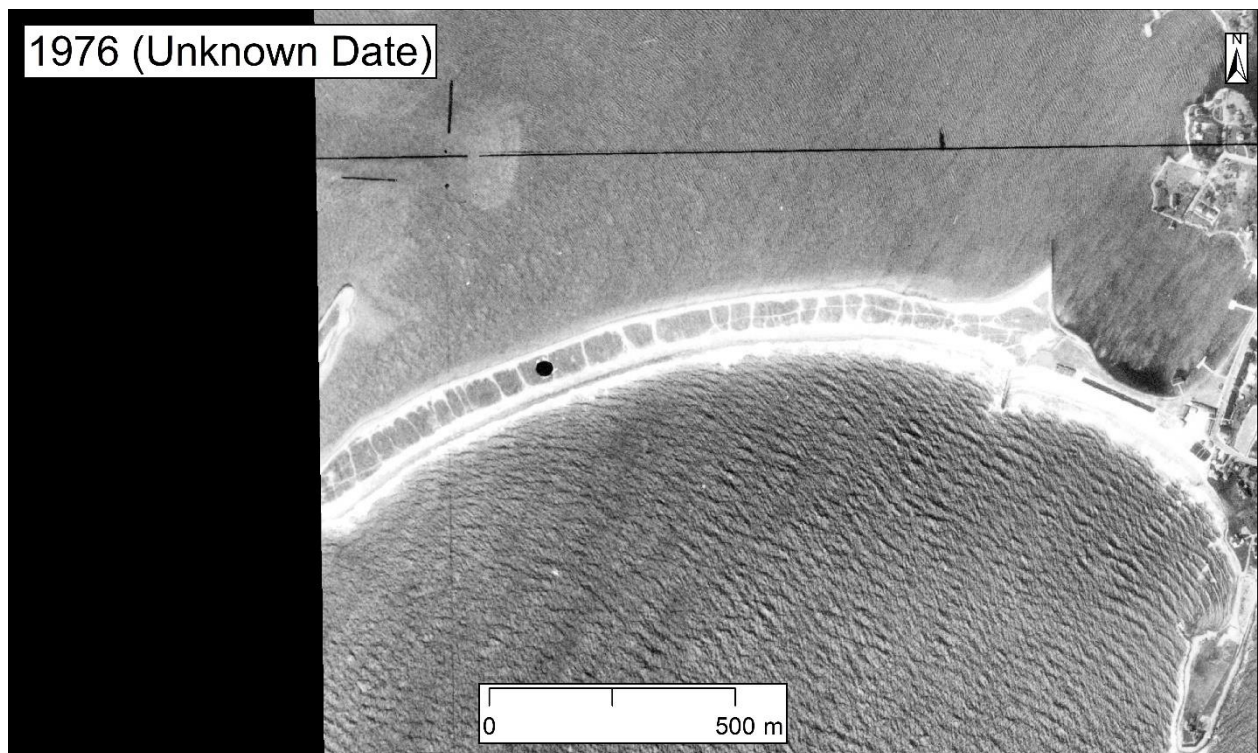

**Figure S10.** 1976 Vertical aerial photograph of the Napatree Barrier [10].

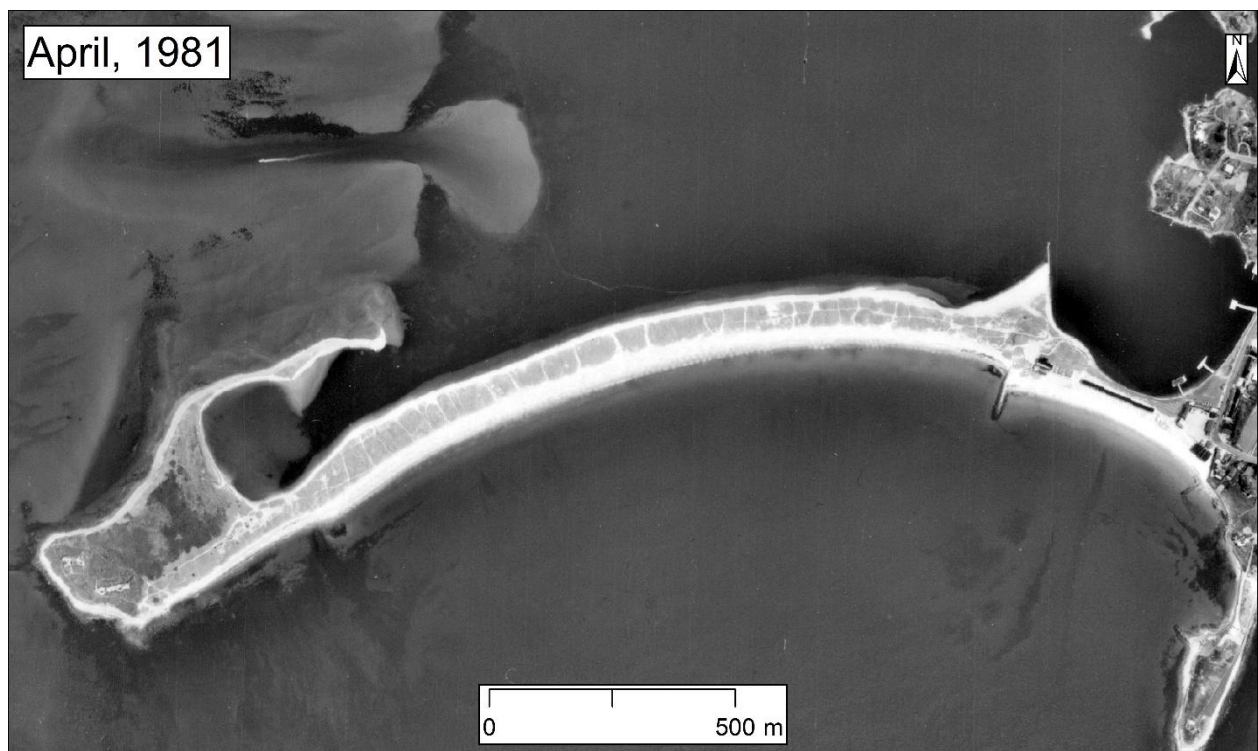

**Figure S11.** April 1981 Vertical aerial photograph of the Napatree Barrier [11].

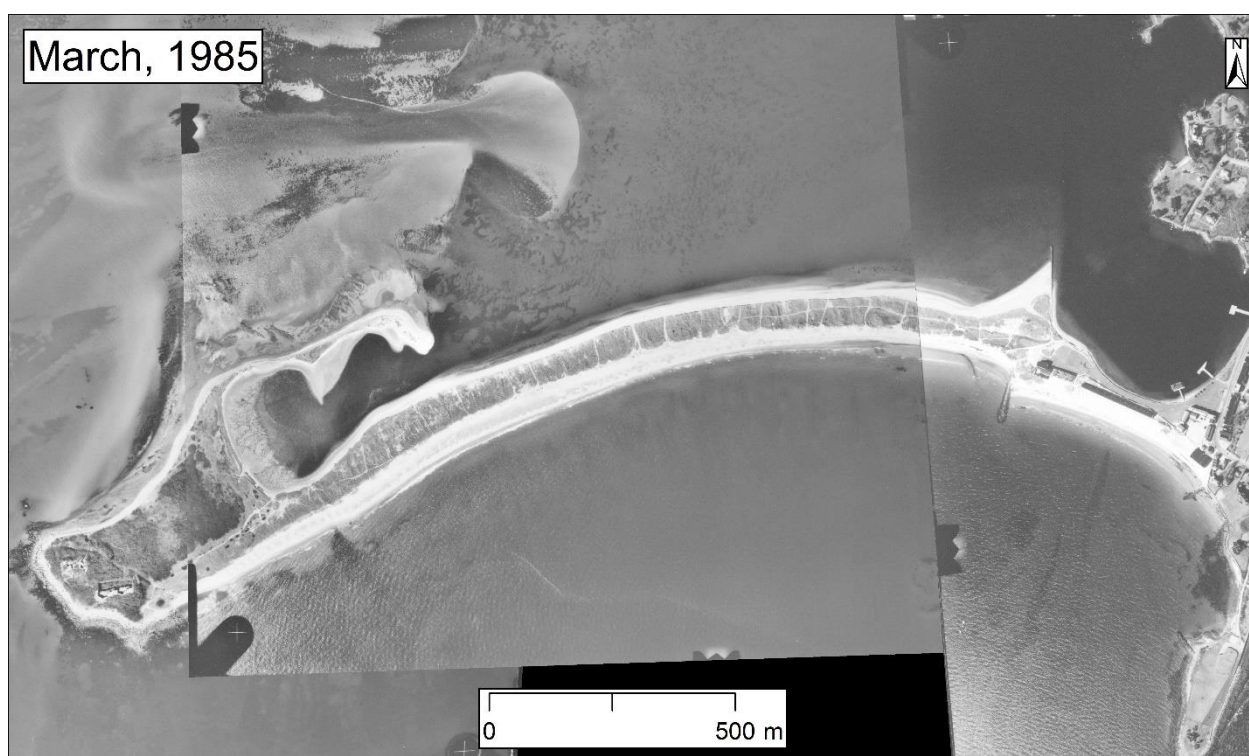

**Figure S12.** March 1985 Vertical aerial photograph of the Napatree Barrier. Original 9x9 Scanned by Boothroyd and Hehre, 2007 [8].

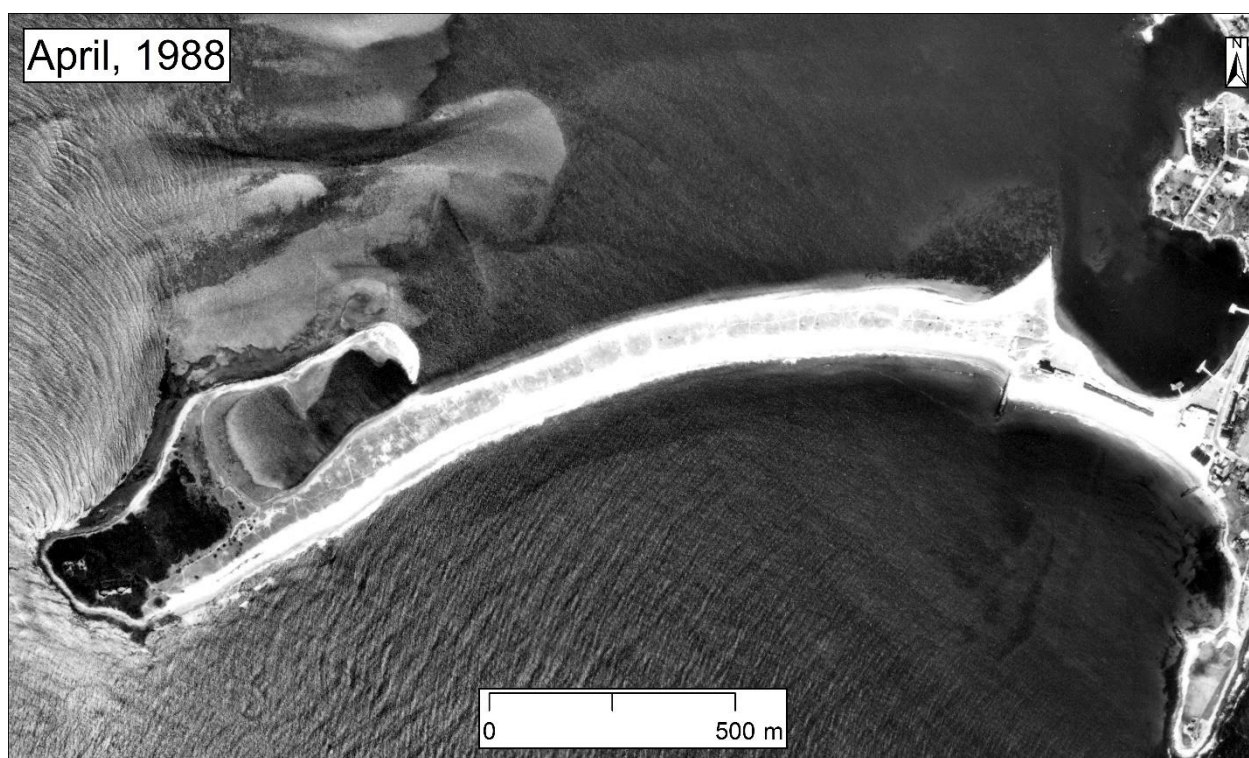

**Figure S13.** April 1988 Vertical aerial photograph of the Napatree Barrier [12].



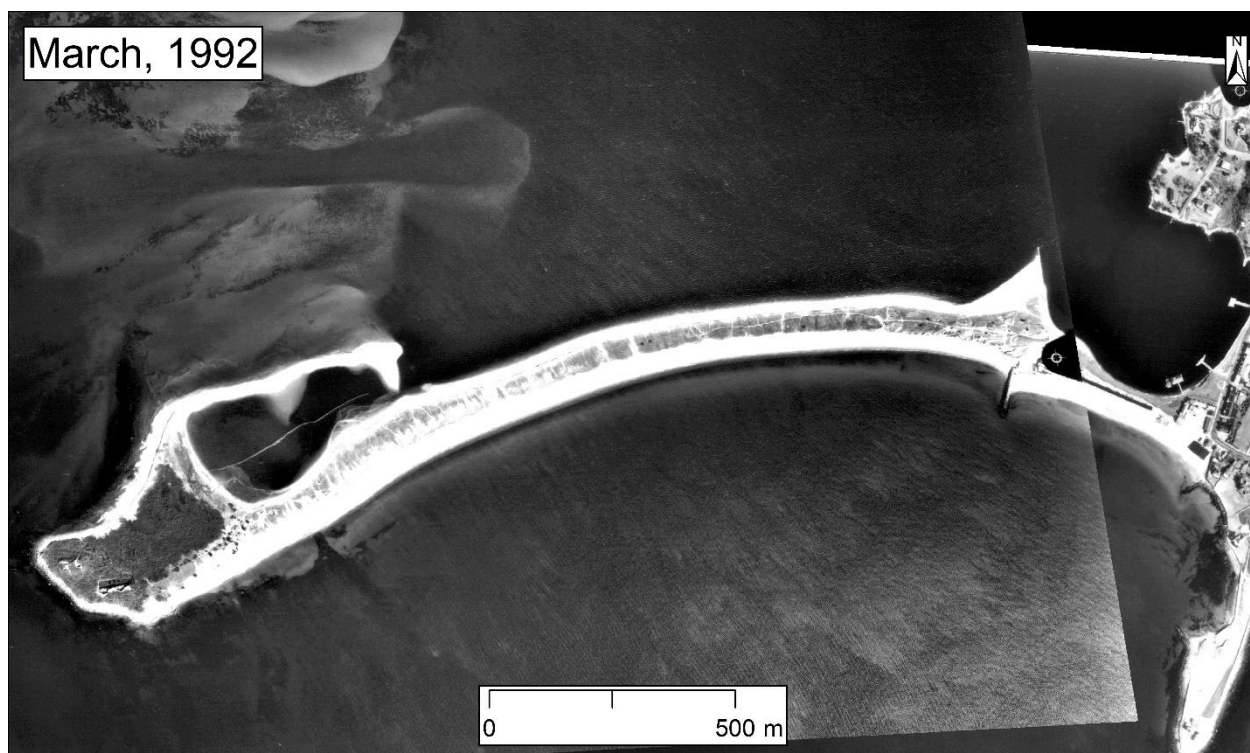

**Figure S14.** March 1992 Vertical aerial photograph of the Napatree Barrier [13].

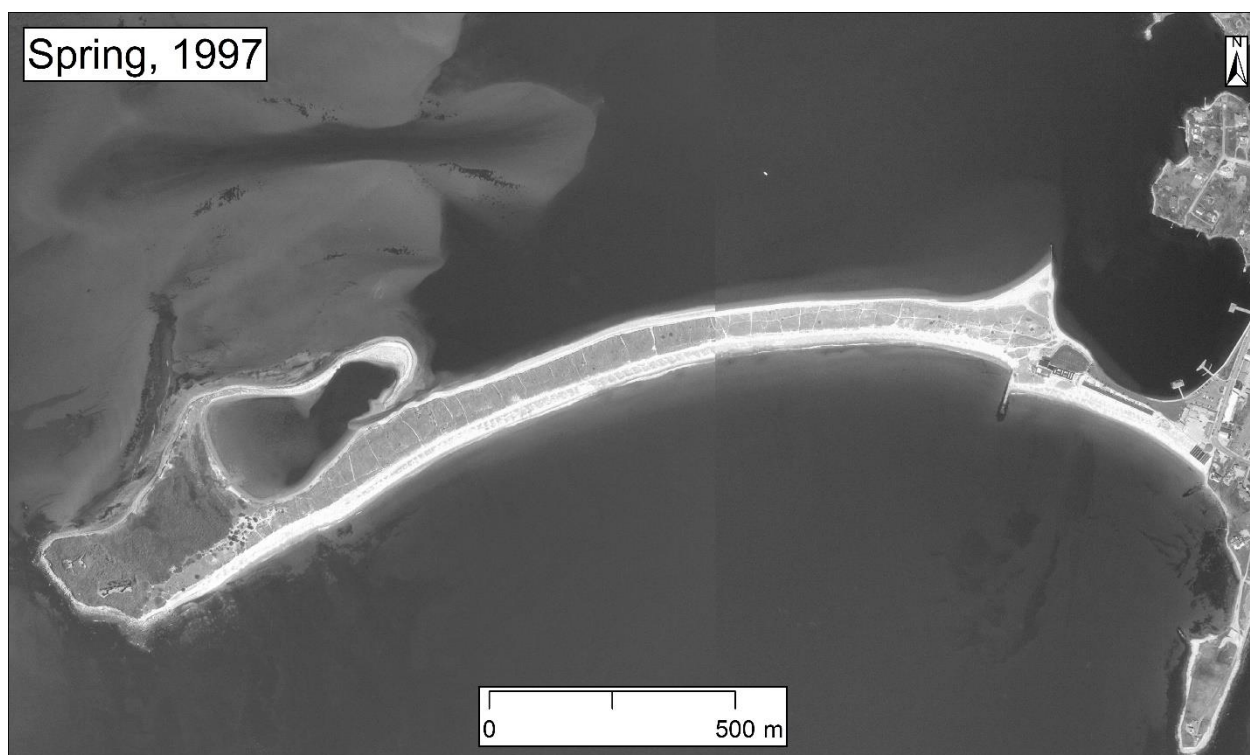

**Figure S15.** Spring 1997 Digital Orthophotograph of the Napatree Barrier [14].



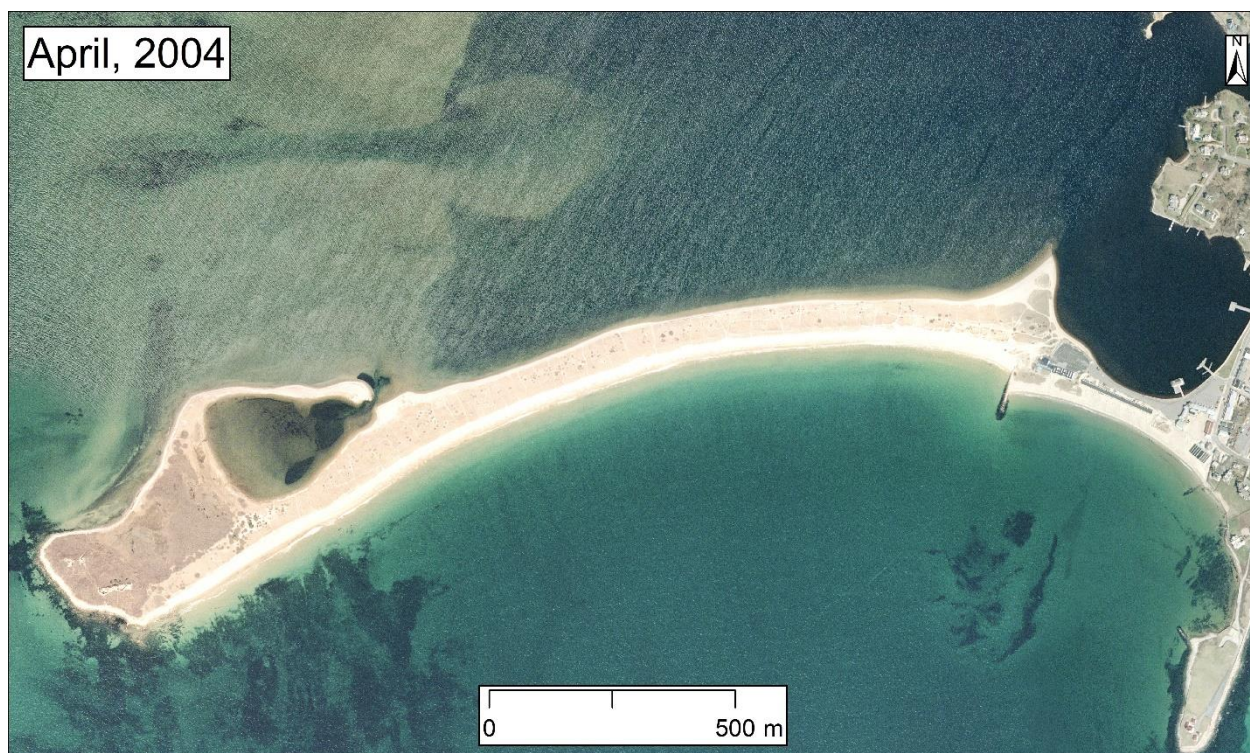

**Figure S16.** April 2004 Digital Orthophotograph of the Napatree Barrier [15].

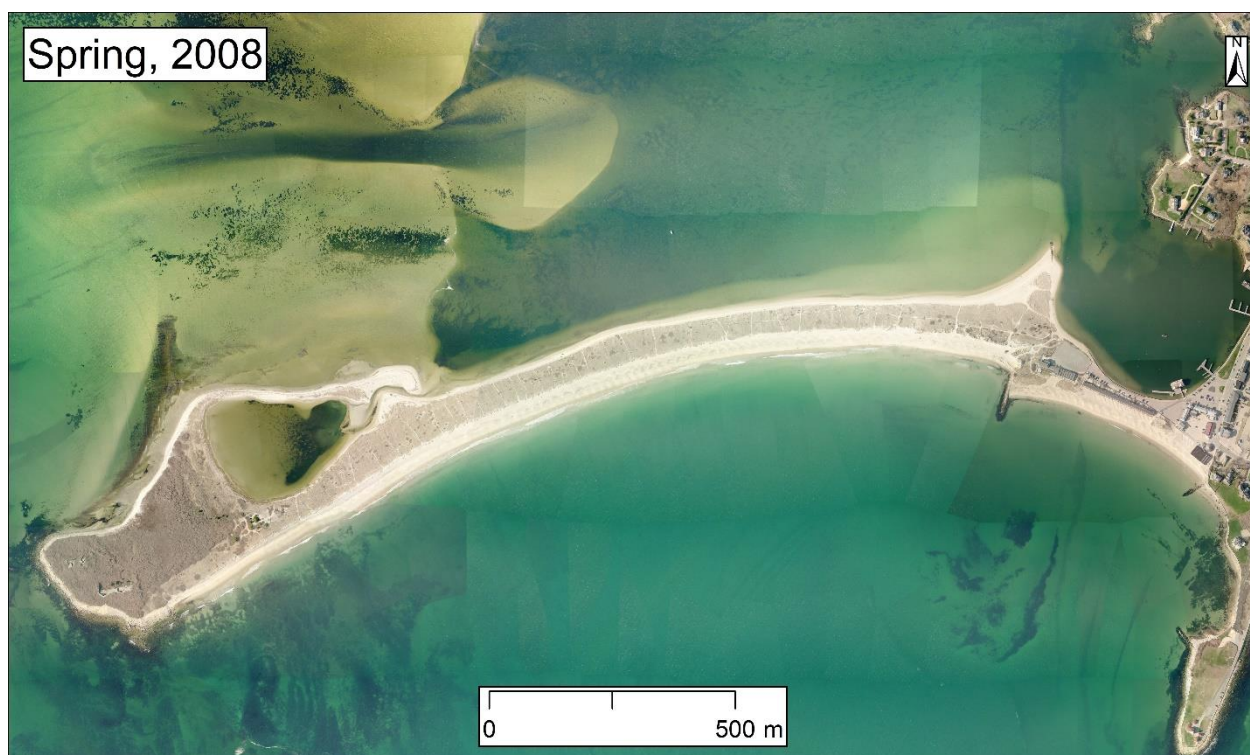

**Figure S17.** Spring 2008 Digital aerial photograph of the Napatree Barrier [16].



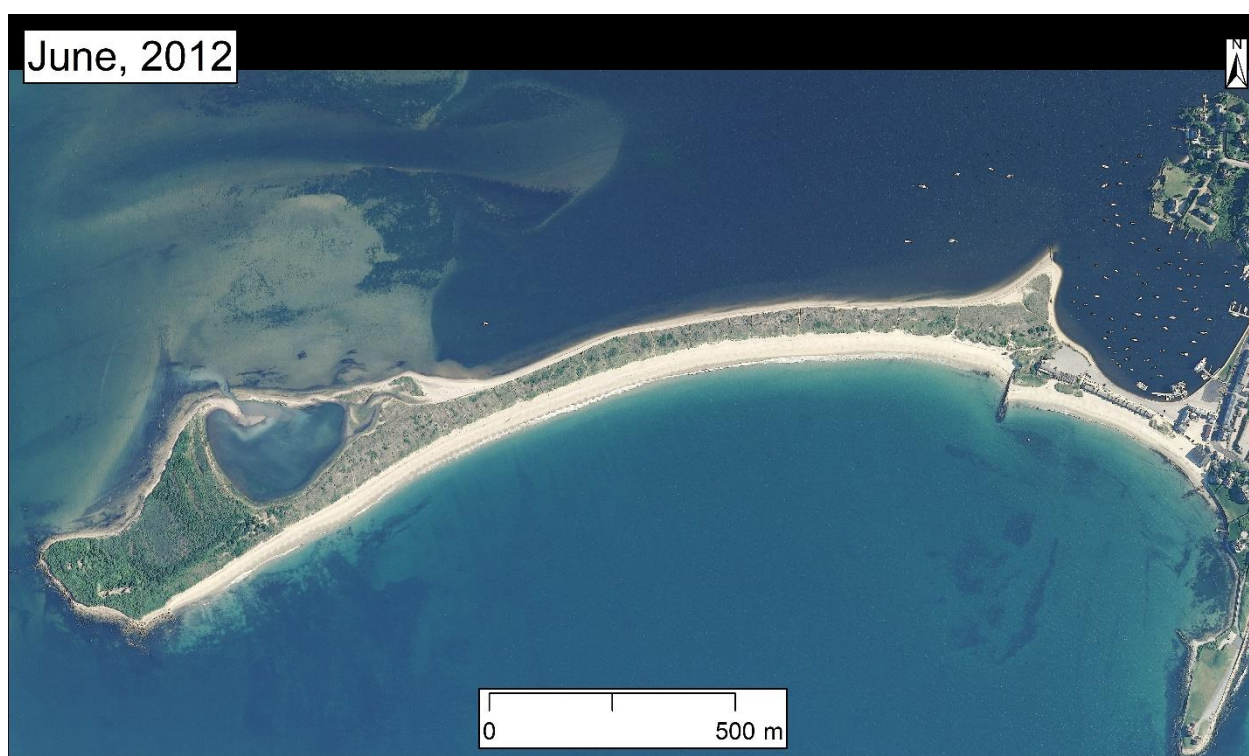

Figure S18. June 2012 Digital Orthophotograph of the Napatree Barrier [17].

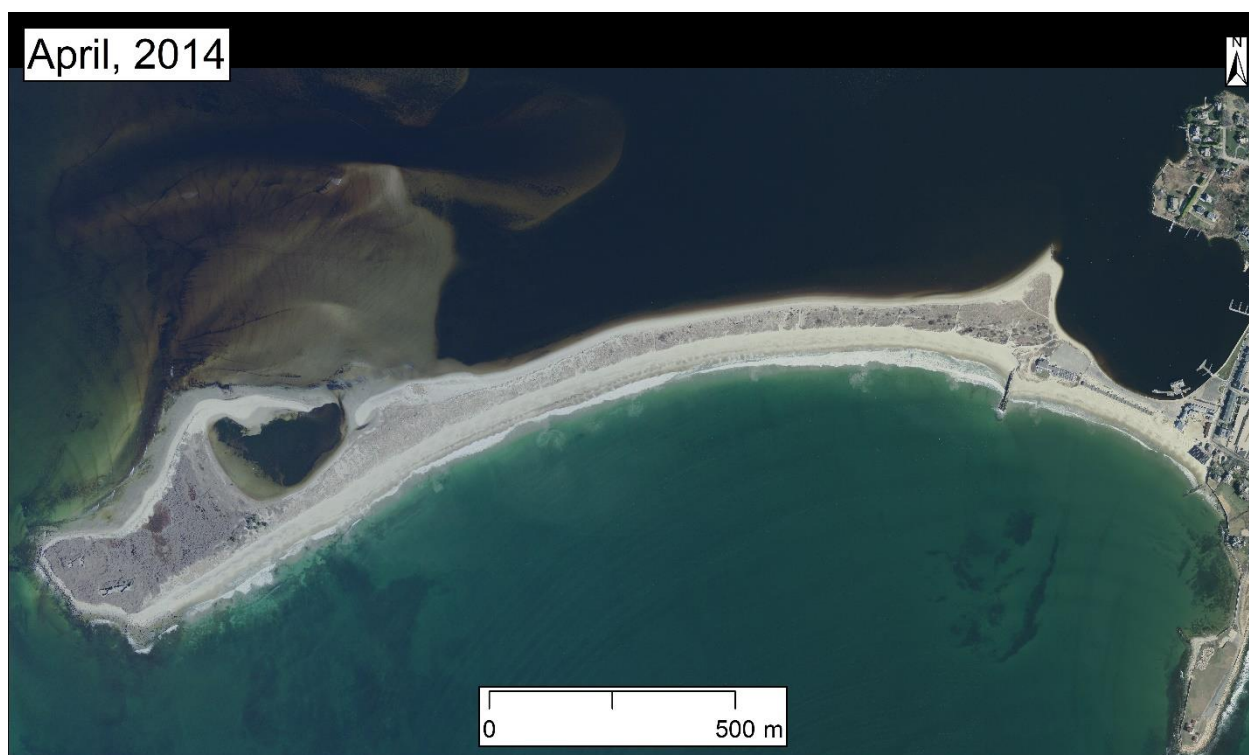

Figure S19. April 2014 Digital Orthophotograph of the Napatree Barrier [18].

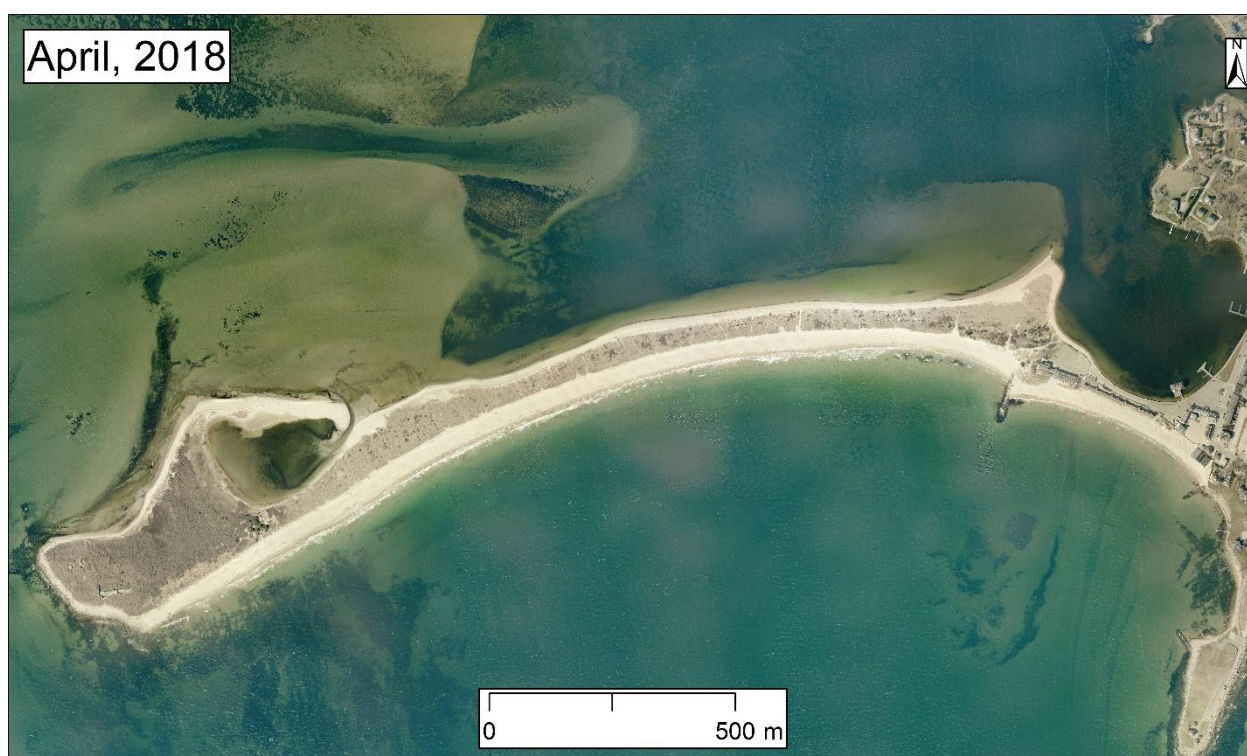

**Figure S20.** April 2018 Digital Aerial Photograph of the Napatree Barrier [19].

## References

1. NOS, 2020. Mean Sea Level Trend Station 8452660 Newport, Rhode Island. Available online: [https://tidesandcurrents.noaa.gov/sltrends/sltrends\\_station.shtml?stnid=8452660](https://tidesandcurrents.noaa.gov/sltrends/sltrends_station.shtml?stnid=8452660) (accessed on 11 November 2020)
2. NOS, 2020. Mean Sea Level Trend Station 8461490 New London, CT. Available online: [https://tidesandcurrents.noaa.gov/sltrends/sltrends\\_station.shtml?id=8461490](https://tidesandcurrents.noaa.gov/sltrends/sltrends_station.shtml?id=8461490) (accessed on (accessed on 11 November 2020)
3. NOS, 2020. Mean Sea Level Trend Station 8510560 Montauk, New York. Available online: [https://tidesandcurrents.noaa.gov/sltrends/sltrends\\_station.shtml?id=8510560](https://tidesandcurrents.noaa.gov/sltrends/sltrends_station.shtml?id=8510560) (accessed on 30 December 2020)
4. CANG. *Aerial survey of Connecticut 1934*; Fairchild Aerial Survey Co., Connecticut Air National Guard, Connecticut State Library/Connecticut State Planning Board: Hartford, CT, USA, 2003
5. RIGIS. *1939 Digital Aerial Photographs*; Rhode Island Geographic Information System (RIGIS) Data Distribution System, Environmental Data Center, University of Rhode Island: Kingston, RI, USA, 2015.
6. RIGIS. *1951–1952 Digital Aerial Photographs*; Rhode Island Geographic Information System (RIGIS) Data Distribution System, Environmental Data Center, University of Rhode Island: Kingston, RI, USA, 2015.
7. RIGIS. *1962 Digital Aerial Photographs*; Rhode Island Geographic Information System (RIGIS) Data Distribution System, Environmental Data Center, University of Rhode Island: Kingston, RI, USA, 2015.
8. Boothroyd, J.C.; Hehre, R.E. *Shoreline Change Maps for the South Shore of Rhode Island*; Rhode Island Geological Survey: Kingston, RI, USA, 2007.
9. RIGIS. *1972 Digital Aerial Photographs*; Rhode Island Geographic Information System (RIGIS) Data Distribution System, Environmental Data Center, University of Rhode Island: Kingston, RI, USA, 2015.
10. RIGIS. *1976 Digital Aerial Photographs*; Rhode Island Geographic Information System (RIGIS) Data Distribution System, Environmental Data Center, University of Rhode Island: Kingston, RI, USA, 2015.
11. RIGIS. *1981 Digital Aerial Photographs*; Rhode Island Geographic Information System (RIGIS) Data Distribution System, Environmental Data Center, University of Rhode Island: Kingston, RI, USA, 2015.
12. RIGIS. *1988 Digital Aerial Photography*; Rhode Island Geographic Information System (RIGIS) Data Distribution System, Environmental Data Center, University of Rhode Island: Kingston, RI, USA, 2015.
13. RIGIS. *1992 Digital Aerial Photography*; Rhode Island Geographic Information System (RIGIS) Data Distribution System, Environmental Data Center, University of Rhode Island: Kingston, RI, USA, 2015.
14. RIDOT. *1997 1:5,000 Digital Orthophotography*; Rhode Island Geographic Information System (RIGIS) Data Distribution System, Environmental Data Center, University of Rhode Island: Kingston, RI, USA, 1997.
15. RIDOT. *2003/2004 Digital Orthophotos of Rhode Island*; Rhode Island Geographic Information System (RIGIS) Data Distribution System, Environmental Data Center, University of Rhode Island: Kingston, RI, USA, 2004.



16. PIC. *Rhode Island E911 uniform emergency telephone system*, Pictometry International Corporation, 2008. *Pictometric Licensed Images (Spring 2008)*; Environmental Data Center, University of Rhode Island: Kingston, RI, USA, 2008.
17. RIGIS. *Rhode Island Eelgrass Mapping Task Force - 2012 Orthophotography Project Rhode Island Eelgrass Mapping Task Force*; Rhode Island Geographic Information System (RIGIS) Data Distribution System, Environmental Data Center, University of Rhode Island: Kingston, RI, USA, 2012.
18. RIGIS. *April 2014 Rhode Island Statewide High Resolution Orthoimages*; Rhode Island Geographic Information System (RIGIS) Data Distribution System, Environmental Data Center, University of Rhode Island: Kingston, RI, USA, 2015.
19. RIDOT. *Spring 2018 Digital Aerial Photographs*; Rhode Island Department Of Transportation, Rhode Island Geographic Information System (RIGIS) Data Distribution System, Environmental Data Center, University of Rhode Island: Kingston, RI, USA, 2018.
